# Supplementary material
Source: publisher site journal article supplement (https://www.dovepress.com/article/385014)
Supplement: Supplementary file 1 [file get_supplementary_file.php]

**Supplementary Table 1.** Correlation between change in mood and anxiety, and change in cognitive function in the Polycystic Ovary Syndrome group (n = 33)

|  | **HADS** | **HADS-A** | **HADS-D** |
| --- | --- | --- | --- |
| **CVC trial 1** | 0.20 | 0.16 | 0.18 |
| **CVC trial 5** | 0.04 | 0.06 | 0.02 |
| **CVC total learning trial 1-5** | -0.05 | -0.03 | -0.06 |
| **CVC delayed recall** | -0.11 | -0.14 | -0.06 |
| **CVCrecog List A** | 0.05 | -0.07 | 0.12 |
| **CVC recog total score** | -0.01 | -0.19 | 0.12 |
| **CVC recog reaction time** | 0.30 | 0.34 | 0.23 |
| **GMLT trial 1** | 0.14 | 0.14 | 0.13 |
| **GMLT trial 5** | -0.12 | -0.02 | -0.16 |
| **GMLT total learning trial 1-5** | -0.15 | -0.06 | -0.19 |
| **GMLT delayed recall** | -0.22 | -0.25 | -0.17 |
| **TCT correct moves** | 0.34 | 0.33 | 0.30 |
| **TCT errors** | 0.06 | 0.33 | 0.03 |
| **TCT moves per second** | 0.35 | 0.33 | 0.30 |
| **TMT Part A** | -0.04 | -0.01 | -0.05 |
| **TMT Part B** | 0.22 | 0.16 | 0.22 |
| **COWAT** | 0.11 | -0.01 | 0.18 |
| **Digit Forwards** | 0.35 | 0.37* | 0.28 |
| **Digit Backwards** | -0.02 | -0.07 | 0.01 |
| **Digit Total** | 0.27 | 0.25 | 0.25 |

***** *p* < 0.05

**Abbreviations:** COWAT, Controlled Oral Word Association Test; CVC, Consonant Vowel Consonant Test; GMLT, Groton Maze Learning Test; HADS, Hospital Anxiety and Depression Scale; HADS-A, Hospital Anxiety and Depression Scale – Anxiety subscale; HADS-D, Hospital Anxiety and Depression Scale – Depression subscale; TCT, Timed Chase Test; TMT, Trail Making Test
